# Supplementary material for: Identification of Inhibitors of the Leishmania cdc2-Related Protein Kinase CRK3
Source: PubMed Central journal article supplement (PMC3272345; doi:10.1002/cmdc.201100344), 2011-09-13
Supplement: cmdc0006-2214-SD1.pdf [file cmdc0006-2214-SD1.pdf]

## Supporting Information

© Copyright Wiley-VCH Verlag GmbH & Co. KGaA, 69451 Weinheim, 2011

### Identification of Inhibitors of the *Leishmania* cdc2-Related Protein Kinase CRK3

Laura A. T. Cleghorn,<sup>[a]</sup> Andrew Woodland,<sup>[a]</sup> Iain T. Collie,<sup>[a]</sup> Leah S. Torrie,<sup>[a]</sup> Neil Norcross,<sup>[a]</sup> Torsten Luksch,<sup>[a]</sup> Chido Mpamhanga,<sup>[a]</sup> Roderick G. Walker,<sup>[b]</sup> Jeremy C. Mottram,<sup>[b]</sup> Ruth Brenk,<sup>[a]</sup> Julie A. Frearson,<sup>[a]</sup> Ian H. Gilbert,<sup>[a]</sup> and Paul G. Wyatt<sup>\*[a]</sup>

cmdc\_201100344\_sm\_miscellaneous\_information.pdf

## **Supporting Information**

### **Table of contents.**

**Table S1:** Sequence identity between CDK2 and CRK3s from kinetoplastid parasites.

**Figure S1.** Average potency from IMAP-FP platform for 24 of the screening hits identified.

**Table S2.** *Leishmania* CRK3:CYC6 and *Hs*CDK2:CDK2 activity for series 3.

**Table S3.** *Leishmania* CRK3:CYC6 and *Hs*CDK2/cyclinA activity for series 5.

**Table S4:** Kinase selectivity data for compound series 3.

**Table S5:** Kinase selectivity data for compound series 5.

**Table S6:** Kinase selectivity data for compound series 7.

**Table S7:** Metabolic turnover of **20** and **25**

**Table S1.** Sequence identity between CDK2 and CRK3s from kinetoplastid parasites (all sequences are compared to *T. brucei* CRK3)

| SWISS_PROT Entry Name | Protein Name                                                       | Organism                   | Sequence Identity |
|-----------------------|--------------------------------------------------------------------|----------------------------|-------------------|
| Q38BA2_9TRYP          | Cell division related protein kinase 2, putative (EC 2.7.1.37).    | <i>Trypanosoma brucei</i>  | 100.0             |
| Q94796_TRYCR          | Cdc2-related protein kinase 3                                      | <i>Trypanosoma cruzi</i>   | 82.0              |
| O15851_LEIME          | Cdc2-related kinase 3                                              | <i>Leishmania mexicana</i> | 78.0              |
| O96526_LEIMA          | Cdc2-related kinase 3                                              | <i>Leishmania major</i>    | 78.0              |
| CDK2_HUMAN            | Cell division protein kinase 2 (EC 2.7.11.22) (p33 protein kinase) | Homo sapiens               | 58.0              |

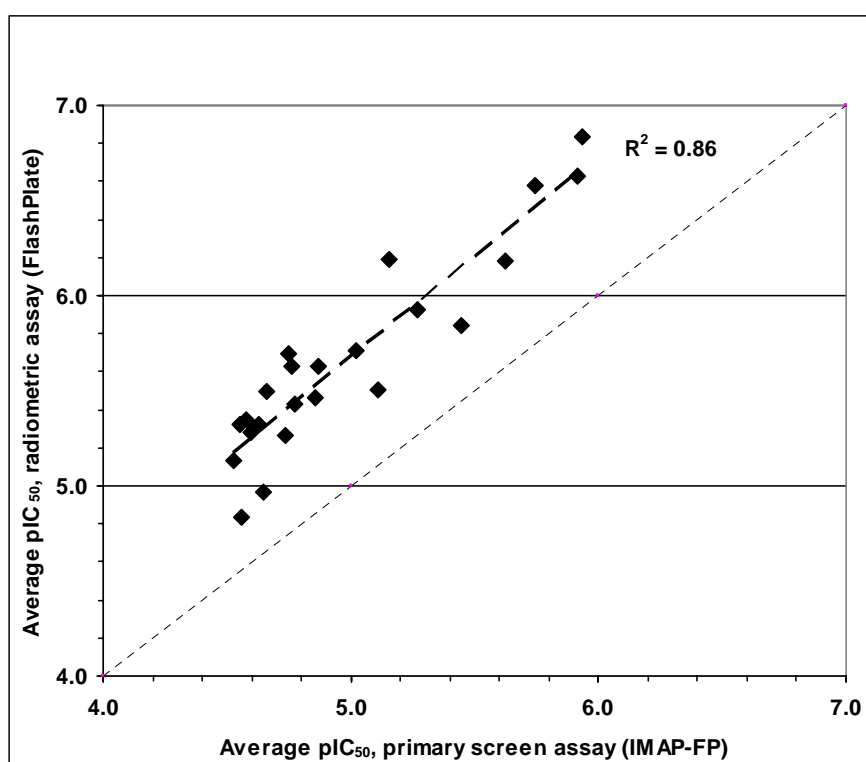

**Figure S1.** Average potency, expressed as pIC<sub>50</sub>, as determined by IMAP-FP platform correlated to the potency value determined in the radiometric assay platform for 24 of the screening hits identified. Correlation coefficient (R<sup>2</sup>) is 0.86.

**Table S2.** *Leishmania* CRK3:CYC6 and *Hs*CDK2:CDK2 activity for series 3 pyrazolopyrimidines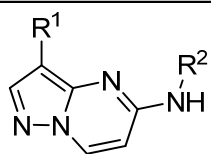

| R <sup>1</sup>         | R <sup>2</sup>                 | <i>Leishmania</i> CRK3:CYC6 %I at 30μM <sup>a</sup> | <i>Leishmania</i> CRK3:CYC6 IC <sub>50</sub> (μM) <sup>b</sup> | <i>Hs</i> CDK2/CYCA IC <sub>50</sub> (μM) <sup>c</sup> |
|------------------------|--------------------------------|-----------------------------------------------------|----------------------------------------------------------------|--------------------------------------------------------|
| H                      | 3,4,5-trimethoxyphenyl         | 0                                                   | -                                                              | -                                                      |
| 3,4,-dimethoxyphenyl   | 3,4,5-trimethoxyphenyl         | 72                                                  | 6                                                              | -                                                      |
| 3-chlorophenyl         | 3,4,5-trimethoxyphenyl         | 25                                                  | -                                                              | -                                                      |
| 3-carboxamidophenyl    | 4-morpholinophenyl             | 93                                                  | 0.26                                                           | 0.43                                                   |
| 3,4,5-trimethoxyphenyl | <i>N,N</i> -dimethylaminoethyl | 3                                                   | -                                                              | -                                                      |
| 3-pyridyl              | 4-morpholinophenyl             | -                                                   | 0.54                                                           | -                                                      |
| 3-methylphenyl         | 4-morpholinophenyl             | -                                                   | 2.6                                                            | >100                                                   |
| Br                     | 4-morpholinophenyl             | -                                                   | 10                                                             | -                                                      |

[a] Percentage inhibition of *Leishmania* CRK3:CYC6 activity at 30 μM [b] Concentration required to inhibit CRK3:CYC6 activity by 50%: data represents the average of 2 or more experiments. [c] Concentration required to inhibit *Hs*CDK2/CYCA activity by 50%: data represents the average of 2 or more experiments.

**Table S3.** *Leishmania* CRK3:CYC6 activity and selectivity compared to HsCDK2/cyclinA for pyrazoles

| 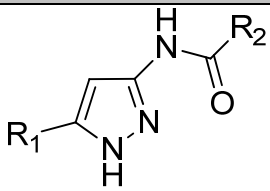 |                 |                                                         |                                                    |
|-----------------------------------------------------------------------------------|-----------------|---------------------------------------------------------|----------------------------------------------------|
| R <sub>1</sub>                                                                    | R <sub>2</sub>  | <i>Leishmania</i><br>CRK3:CYC6<br>IC <sub>50</sub> (μM) | <i>Hs</i><br>CDK2:cyclinA<br>IC <sub>50</sub> (μM) |
| Cyclopropyl                                                                       | Cyclobutyl      | 2.1                                                     | 0.089                                              |
| 2,6-Difluorophenyl                                                                | Cyclobutyl      | 1.3                                                     | 1.9                                                |
| 3-pyridyl                                                                         | Cyclobutyl      | 20                                                      | 6.6                                                |
| Benzyl                                                                            | Cyclobutyl      | 11                                                      | 1.1                                                |
| Benzyl                                                                            | Methyl          | 64                                                      | 4.0                                                |
| Benzyl                                                                            | Phenyl          | 9.2                                                     | 3.0                                                |
| 3-pyridyl                                                                         | Phenyl          | 23                                                      | 100                                                |
| 2,6-Difluorophenyl                                                                | Phenyl          | 3.0                                                     | 100                                                |
| 2,6-Difluorophenyl                                                                | Methyl          | 9.0                                                     | 3.4                                                |
| Cyclopropyl                                                                       | Phenyl          | 1.7                                                     | 0.15                                               |
| 4-Chlorophenyl                                                                    | Cyclohexyl      | 0.33                                                    | 100                                                |
| 4-Chlorophenyl                                                                    | 3-Phenol        | 1.1                                                     | 5.4                                                |
| 4-Chlorophenyl                                                                    | 2-Thiophene     | 1.2                                                     | 3.5                                                |
| 4-Chlorophenyl                                                                    | 4-Methoxyphenol | 33                                                      | nd <sup>[c]</sup>                                  |
| 4-Chlorophenyl                                                                    | Cyclopropyl     | 1.5                                                     | nd <sup>[c]</sup>                                  |
| 4-Chlorophenyl                                                                    | 3-Fluorophenyl  | 100                                                     | nd <sup>[c]</sup>                                  |
| 4-Chlorophenyl                                                                    | 2-Methylphenyl  | 100                                                     | nd <sup>[c]</sup>                                  |

<sup>[a]</sup> Concentration required to inhibit *Leishmania* CRK3:CYC6 activity by 50%: data represents the average of 2 or more experiments. <sup>[b]</sup> Concentration required to inhibit *Hs*CDK2/cyclinA activity by 50%: data represents the average of 2 experiments. <sup>[c]</sup> nd = not determined

**Table S4:** Kinase selectivity data for compound series 3. Compounds were incubated against 76 recombinant human kinases at a concentration of 10  $\mu$ M. The percentage activity of each kinase is shown. Where highlighted in red the enzymes have < 10 % or > 100 % activity; when highlighted in orange > 10 % but < 29 %; when highlighted in yellow > 30 % but < 49 %.

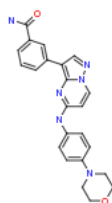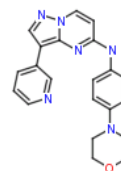

**10 $\mu$ M**

**10 $\mu$ M**

|           |    |    |
|-----------|----|----|
| MKK1      | 25 | 41 |
| ERK1      | 93 | 90 |
| ERK2      | 87 | 96 |
| JNK1      | 80 | 76 |
| JNK2      | 74 | 64 |
| p38a MAPK | 78 | 79 |
| P38b MAPK | 77 | 70 |
| p38g MAPK | 57 | 74 |
| p38s MAPK | 72 | 88 |
| ERK8      | 5  | 8  |
| RSK1      | 17 | 38 |
| RSK2      | 37 | 52 |
| PDK1      | 36 | 63 |
| PKBa      | 67 | 84 |
| PKBb      | 41 | 55 |
| SGK1      | 86 | 61 |
| S6K1      | 18 | 49 |
| PKA       | 53 | 62 |
| ROCK 2    | 57 | 55 |
| PRK2      | 41 | 86 |

|                     |     |     |
|---------------------|-----|-----|
| PKCa                | 20  | 33  |
| PKC zeta            | 27  | 61  |
| PKD1                | 136 | 160 |
| MSK1                | 18  | 44  |
| MNK1                | 23  | 86  |
| MNK2                | 25  | 54  |
| MAPKAP-K2           | 93  | 95  |
| PRAK                | 70  | 70  |
| CAMKKb              | 42  | 42  |
| CAMK1               | 54  | 68  |
| SmMLCK              | 45  | 55  |
| PHK                 | 4   | 6   |
| CHK1                | 59  | 29  |
| CHK2                | 28  | 26  |
| GSK3b               | 21  | 21  |
| CDK2-Cyclin A       | 3   | 42  |
| PLK1                | 51  | 53  |
| PLK1 (Okadaic Acid) | 49  | 53  |
| AMPK                | 18  | 32  |
| MARK3               | 17  | 64  |
| BRSK2               | 33  | 40  |
| MELK                | 28  | 10  |
| CK1                 | 59  | 46  |
| CK2                 | 12  | 20  |
| DYRK1A              | 2   | 14  |
| DYRK2               | 7   | 5   |
| DYRK3               | 9   | 10  |
| NEK2a               | 80  | 75  |
| NEK6                | 177 | 133 |
| IKKb                | 47  | 47  |

|        |     |     |
|--------|-----|-----|
| PIM1   | 27  | 18  |
| PIM2   | 16  | 28  |
| PIM3   | 4   | 9   |
| SRPK1  | 48  | 61  |
| MST2   | 15  | 44  |
| EFK2   | 103 | 102 |
| HIPK2  | 4   | 3   |
| PAK4   | 66  | 50  |
| PAK5   | 59  | 61  |
| PAK6   | 76  | 71  |
| Src    | 4   | 8   |
| Lck    | 7   | 10  |
| CSK    | 15  | 48  |
| FGF-R1 | 11  | 5   |
| IRR    | 4   | 12  |
| EPH A2 | 65  | 69  |
| MST4   | 73  | 77  |
| SYK    | 80  | 66  |
| YES1   | 9   | 12  |
| IKKe   | 26  | 46  |
| TBK1   | 17  | 58  |
| IGF1-R | 47  | 44  |
| VEG-FR | 15  | 8   |
| BTK    | 9   | 38  |
| IR-HIS | 65  | 78  |
| EPH-B3 | 29  | 33  |



**Table S5:** Kinase selectivity data for compound series 5. C Compounds were incubated against 76 recombinant human kinases at a concentration of 10  $\mu$ M. The percentage activity of each kinase is shown. Where highlighted in red the enzymes have < 10 % or > 100 % activity; when highlighted in orange > 10 % but < 29 %; when highlighted in yellow > 30 % but < 49 %.

### Compound 11

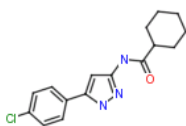

#### 10 $\mu$ M

|           |    |
|-----------|----|
| MKK1      | 68 |
| ERK1      | 86 |
| ERK2      | 91 |
| JNK1      | 98 |
| JNK2      | 87 |
| p38a MAPK | 84 |
| P38b MAPK | 66 |
| p38g MAPK | 79 |
| p38s MAPK | 83 |
| ERK8      | 33 |
| RSK1      | 76 |
| RSK2      | 69 |
| PDK1      | 99 |
| PKBa      | 89 |
| PKBb      | 75 |
| SGK1      | 86 |

|                     |     |
|---------------------|-----|
| S6K1                | 97  |
| PKA                 | 84  |
| ROCK 2              | 88  |
| PRK2                | 101 |
| PKCa                | 103 |
| PKC zeta            | 73  |
| PKD1                | 184 |
| MSK1                | 83  |
| MNK1                | 82  |
| MNK2                | 81  |
| MAPKAP-K2           | 97  |
| PRAK                | 76  |
| CAMKKb              | 72  |
| CAMK1               | 154 |
| SmMLCK              | 89  |
| PHK                 | 75  |
| CHK1                | 79  |
| CHK2                | 92  |
| GSK3b               | 27  |
| CDK2-Cyclin A       | 71  |
| PLK1                | 86  |
| PLK1 (Okadaic Acid) | 90  |
| AMPK                | 86  |
| MARK3               | 78  |
| BRSK2               | 82  |
| MELK                | 84  |
| CK1                 | 87  |
| CK2                 | 103 |
| DYRK1A              | 65  |
| DYRK2               | 84  |

|        |     |
|--------|-----|
| DYRK3  | 87  |
| NEK2a  | 90  |
| NEK6   | 171 |
| IKKb   | 100 |
| PIM1   | 87  |
| PIM2   | 81  |
| PIM3   | 97  |
| SRPK1  | 75  |
| MST2   | 93  |
| EFK2   | 105 |
| HIPK2  | 89  |
| PAK4   | 56  |
| PAK5   | 67  |
| PAK6   | 84  |
| Src    | 105 |
| Lck    | 73  |
| CSK    | 81  |
| FGF-R1 | 114 |
| IRR    | 30  |
| EPH A2 | 105 |
| MST4   | 68  |
| SYK    | 94  |
| YES1   | 89  |
| IKKe   | 72  |
| TBK1   | 72  |
| IGF1-R | 99  |
| VEG-FR | 75  |
| BTK    | 81  |
| IR-HIS | 86  |
| EPH-B3 | 82  |

|

**Table S6:** Kinase selectivity data for compound series 7. Compounds were incubated against 76 recombinant human kinases at a concentration of 10  $\mu$ M. The percentage activity of each kinase is shown. Where highlighted in red the enzymes have < 10 % or > 100 % activity; when highlighted in orange > 10 % but < 29 %; when highlighted in yellow > 30 % but < 49 %.

|           | <b>Compound 38</b>                                                                | <b>Compound 39</b>                                                                 | <b>Compound 32</b>                                                                  |
|-----------|-----------------------------------------------------------------------------------|------------------------------------------------------------------------------------|-------------------------------------------------------------------------------------|
|           | 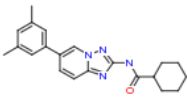 |  |  |
|           | <b>10<math>\mu</math>M</b>                                                        | <b>10<math>\mu</math>M</b>                                                         | <b>10<math>\mu</math>M</b>                                                          |
| MKK1      | 47                                                                                | 43                                                                                 | 59                                                                                  |
| ERK1      | 97                                                                                | 92                                                                                 | 92                                                                                  |
| ERK2      | 93                                                                                | 90                                                                                 | 86                                                                                  |
| JNK1      | 101                                                                               | 102                                                                                | 101                                                                                 |
| JNK2      | 83                                                                                | 82                                                                                 | 94                                                                                  |
| p38a MAPK | 104                                                                               | 95                                                                                 | 95                                                                                  |
| P38b MAPK | 91                                                                                | 87                                                                                 | 79                                                                                  |
| p38g MAPK | 102                                                                               | 93                                                                                 | 88                                                                                  |
| p38s MAPK | 86                                                                                | 75                                                                                 | 74                                                                                  |
| ERK8      | 86                                                                                | 83                                                                                 | 72                                                                                  |
| RSK1      | 62                                                                                | 70                                                                                 | 68                                                                                  |
| RSK2      | 66                                                                                | 56                                                                                 | 62                                                                                  |
| PDK1      | 96                                                                                | 103                                                                                | 96                                                                                  |
| PKBa      | 93                                                                                | 86                                                                                 | 98                                                                                  |
| PKBb      | 67                                                                                | 66                                                                                 | 59                                                                                  |
| SGK1      | 103                                                                               | 100                                                                                | 96                                                                                  |
| S6K1      | 95                                                                                | 107                                                                                | 105                                                                                 |
| PKA       | 84                                                                                | 82                                                                                 | 82                                                                                  |
| ROCK 2    | 95                                                                                | 86                                                                                 | 92                                                                                  |

|                     |     |     |     |
|---------------------|-----|-----|-----|
| PRK2                | 84  | 103 | 79  |
| PKCa                | 87  | 97  | 95  |
| PKC zeta            | 88  | 87  | 76  |
| PKD1                | 92  | 110 | 80  |
| MSK1                | 71  | 56  | 68  |
| MNK1                | 80  | 84  | 79  |
| MNK2                | 68  | 79  | 50  |
| MAPKAP-K2           | 95  | 93  | 102 |
| PRAK                | 65  | 60  | 63  |
| CAMKKb              | 85  | 89  | 45  |
| CAMK1               | 74  | 83  | 75  |
| SmMLCK              | 92  | 88  | 85  |
| PHK                 | 72  | 69  | 50  |
| CHK1                | 76  | 70  | 77  |
| CHK2                | 99  | 93  | 76  |
| GSK3b               | 70  | 73  | 78  |
| CDK2-Cyclin A       | 105 | 98  | 90  |
| PLK1                | 90  | 83  | 78  |
| PLK1 (Okadaic Acid) | 56  | 52  | 62  |
| AMPK                | 93  | 97  | 98  |
| MARK3               | 86  | 88  | 90  |
| BRSK2               | 71  | 67  | 76  |
| MELK                | 65  | 69  | 62  |
| CK1                 | 82  | 86  | 92  |
| CK2                 | 101 | 106 | 104 |
| DYRK1A              | 59  | 36  | 15  |
| DYRK2               | 62  | 48  | 11  |
| DYRK3               | 59  | 33  | 4   |
| NEK2a               | 89  | 83  | 77  |
| NEK6                | 84  | 83  | 81  |

|        |     |     |     |
|--------|-----|-----|-----|
| IKKb   | 95  | 97  | 93  |
| PIM1   | 90  | 99  | 78  |
| PIM2   | 103 | 100 | 91  |
| PIM3   | 91  | 84  | 78  |
| SRPK1  | 64  | 53  | 65  |
| MST2   | 100 | 94  | 94  |
| EFK2   | 107 | 107 | 102 |
| HIPK2  | 114 | 102 | 86  |
| PAK4   | 111 | 101 | 94  |
| PAK5   | 88  | 74  | 68  |
| PAK6   | 84  | 82  | 83  |
| Src    | 98  | 93  | 89  |
| Lck    | 71  | 80  | 79  |
| CSK    | 84  | 81  | 68  |
| FGF-R1 | 124 | 88  | 96  |
| IRR    | 50  | 27  | 14  |
| EPH A2 | 87  | 93  | 84  |
| MST4   | 82  | 84  | 71  |
| SYK    | 94  | 95  | 87  |
| YES1   | 89  | 94  | 101 |
| IKKe   | 100 | 108 | 104 |
| TBK1   | 102 | 99  | 86  |
| IGF1-R | 78  | 94  | 104 |
| VEG-FR | 57  | 74  | 55  |
| BTK    | 63  | 59  | 61  |
| IR-HIS | 80  | 78  | 77  |
| EPH-B3 | 90  | 78  | 82  |

**Table S6 cont:** Kinase Selectivity Data compound series 7  
 Compounds were incubated against 76 recombinant human kinases at a concentration of 10  $\mu$ M. The percentage activity of each kinase is shown. Where highlighted in red the enzymes have < 10 % or > 100 % activity; when highlighted in orange > 10 % but < 29 %; when highlighted in yellow > 30 % but < 49 %.

| <b>Compound 66</b>                                                                |            | <b>Compound 25</b>                                                                 |
|-----------------------------------------------------------------------------------|------------|------------------------------------------------------------------------------------|
| 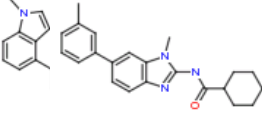 |            |  |
| <b>10<math>\mu</math>M</b>                                                        |            | <b>10<math>\mu</math>M</b>                                                         |
| MKK1                                                                              | <b>67</b>  | <b>74</b>                                                                          |
| ERK1                                                                              | <b>93</b>  | <b>96</b>                                                                          |
| ERK2                                                                              | <b>99</b>  | <b>75</b>                                                                          |
| JNK1                                                                              | <b>100</b> | <b>101</b>                                                                         |
| JNK2                                                                              | <b>86</b>  | <b>82</b>                                                                          |
| p38a MAPK                                                                         | <b>96</b>  | <b>86</b>                                                                          |
| P38b MAPK                                                                         | <b>78</b>  | <b>82</b>                                                                          |
| p38g MAPK                                                                         | <b>109</b> | <b>92</b>                                                                          |
| p38s MAPK                                                                         | <b>81</b>  | <b>78</b>                                                                          |
| ERK8                                                                              | <b>89</b>  | <b>77</b>                                                                          |
| RSK1                                                                              | <b>85</b>  | <b>67</b>                                                                          |
| RSK2                                                                              | <b>80</b>  | <b>76</b>                                                                          |
| PDK1                                                                              | <b>97</b>  | <b>101</b>                                                                         |
| PKBa                                                                              | <b>85</b>  | <b>99</b>                                                                          |
| PKBb                                                                              | <b>78</b>  | <b>75</b>                                                                          |
| SGK1                                                                              | <b>95</b>  | <b>105</b>                                                                         |
| S6K1                                                                              | <b>112</b> | <b>86</b>                                                                          |
| PKA                                                                               | <b>84</b>  | <b>87</b>                                                                          |
| ROCK 2                                                                            | <b>95</b>  | <b>98</b>                                                                          |



|                     |     |     |
|---------------------|-----|-----|
| PRK2                | 92  | 98  |
| PKCa                | 138 | 110 |
| PKC zeta            | 87  | 85  |
| PKD1                | 84  | 89  |
| MSK1                | 72  | 68  |
| MNK1                | 104 | 82  |
| MNK2                | 85  | 67  |
| MAPKAP-K2           | 101 | 105 |
| PRAK                | 74  | 75  |
| CAMKKb              | 68  | 47  |
| CAMK1               | 77  | 78  |
| SmMLCK              | 79  | 83  |
| PHK                 | 71  | 56  |
| CHK1                | 84  | 79  |
| CHK2                | 76  | 95  |
| GSK3b               | 71  | 71  |
| CDK2-Cyclin A       | 106 | 101 |
| PLK1                | 88  | 81  |
| PLK1 (Okadaic Acid) | 70  | 83  |
| AMPK                | 102 | 99  |
| MARK3               | 98  | 91  |
| BRSK2               | 83  | 64  |
| MELK                | 73  | 71  |
| CK1                 | 76  | 87  |
| CK2                 | 99  | 106 |
| DYRK1A              | 59  | 10  |
| DYRK2               | 45  | 24  |
| DYRK3               | 13  | 19  |
| NEK2a               | 90  | 95  |
| NEK6                | 81  | 88  |

|        |     |     |
|--------|-----|-----|
| IKKb   | 103 | 90  |
| PIM1   | 61  | 99  |
| PIM2   | 108 | 100 |
| PIM3   | 93  | 99  |
| SRPK1  | 68  | 75  |
| MST2   | 94  | 107 |
| EFK2   | 106 | 105 |
| HIPK2  | 108 | 96  |
| PAK4   | 91  | 96  |
| PAK5   | 71  | 82  |
| PAK6   | 93  | 76  |
| Src    | 88  | 88  |
| Lck    | 90  | 77  |
| CSK    | 87  | 94  |
| FGF-R1 | 123 | 111 |
| IRR    | 36  | 11  |
| EPH A2 | 95  | 94  |
| MST4   | 86  | 79  |
| SYK    | 106 | 94  |
| YES1   | 101 | 92  |
| IKKe   | 95  | 86  |
| TBK1   | 115 | 101 |
| IGF1-R | 112 | 97  |
| VEG-FR | 56  | 53  |
| BTK    | 58  | 71  |
| IR-HIS | 78  | 115 |
| EPH-B3 | 97  | 93  |

| Table S7: Metabolic turnover of <b>20</b> and <b>25</b>                                                                                                                                  |                                                                                   |                            |                            |            |      |                                     |                          |
|------------------------------------------------------------------------------------------------------------------------------------------------------------------------------------------|-----------------------------------------------------------------------------------|----------------------------|----------------------------|------------|------|-------------------------------------|--------------------------|
| Compd                                                                                                                                                                                    | Structure                                                                         | Human % turnover at 40 min | Mouse % turnover at 30 min | PPB FU (%) | LogD | <i>T.brucei</i> EC <sub>50</sub> μM | CDK2 IC <sub>50</sub> μM |
| <b>25</b>                                                                                                                                                                                | 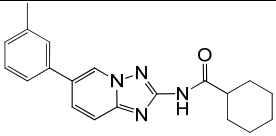 | 100                        | 100                        | 87         | 3.86 | 6.6                                 | 19                       |
| <b>20</b>                                                                                                                                                                                |  | 33                         | 31                         | 83         | 2.24 | 0.9                                 | 69                       |
| Assessed for stability in human and mouse liver microsomes, protein binding in mouse plasma and LogD determination. All assays were performed using the standard BioFocus DPI protocols. |                                                                                   |                            |                            |            |      |                                     |                          |

#### Additional Experimental Section

**N-(5-(4-Chlorophenyl)-1H-pyrazol-3-yl)acetamide (2).** Prepared following the same procedure as **8** to afford **2** (2mg, 2%) as a white solid. <sup>1</sup>H NMR (d<sup>6</sup> DMSO, 500 MHz) δ 12.88 (1H, s, NH), 10.45 (1H, s, NH), 7.75-7.73 (2H, m, ArH), 7.52-7.50 (2H, m, ArH), 2.02 (3H, s, CH<sub>3</sub>); LCMS (ES) M+H (100%).

**N-(5-(4-Chlorophenyl)-1H-pyrazol-3-yl)cyclobutanecarboxamide (7).** Prepared following the same procedure as **8** to afford **7** (18 mg, 12%) as a white solid. <sup>1</sup>H NMR (d<sup>6</sup> DMSO, 500 MHz) δ 12.87 (1H, s, NH), 10.31 (1H, s, NH), 7.75-7.74 (2H, m, ArH), 7.52-7.50 (2H, m, ArH), 6.93 (1H, s, ArH), 3.25 (1H, qn, *J* = 8.4Hz, CH), 2.25-2.17 (2H, m, CH), 2.11-2.07 (2H, m, CH), 1.98-1.90 (1H, m, CH), 1.83-1.79 (1H, m, CH); LCMS (ES) M+H, (100%).

**N-(5-(4-Chlorophenyl)-1H-pyrazol-3-yl)-2-phenylacetamide (9).** Prepared following the same procedure as **8** to afford **9** (20mg, 13%) as a white solid. <sup>1</sup>H NMR (d<sup>6</sup> DMSO, 500 MHz) δ 7.73-7.72 (2H, m, ArH), 7.49-7.47 (2H, m, ArH), 7.34 (4H, broad s, ArH), 7.24 (1H, broad s, ArH), 6.80 (1H, s, ArH), 3.62 (2H, s, CH<sub>2</sub>); LCMS (ES) M+H, (100%).

**N-(5-(4-Chlorophenyl)-1H-pyrazol-3-yl)nicotinamide (10).** Prepared following the same procedure as **8** to afford **10** (28mg, 19%) as a light pink solid. <sup>1</sup>H NMR (d<sup>6</sup> DMSO, 500 MHz) δ 13.10 (1H, s, NH), 11.17 (1H, s, NH), 9.16-9.15 (1H, m, ArH), 8.76 (1H, s, ArH), 8.37-8.35 (1H, m, ArH), 7.81-7.80 (2H, m, ArH), 7.56-7.54 (3H, m, ArH), 7.11 (1H, s, ArH); LCMS (ES) M+H, (97%).

**N-(6-(4-Hydroxy-3-methoxyphenyl)**

**[1,2,4]triazolo[1,5a]pyridinyl)cyclohexanecarboxamide (14).** Prepared according to general procedure A. <sup>1</sup>H NMR (500 MHz, DMSO): 10.67 (1H, s, NH), 9.25 (1H, s, OH), 9.16 (1H, s, ArH), 7.96 (1H, d, ArH, *J* = 8.9 Hz), 7.68-7.70 (1H, m, ArH), 7.35 (1H, s, ArH), 7.19-7.20 (1H, m, ArH), 6.87-6.89 (1H, m, ArH), 3.89 (3H, s, CH<sub>3</sub>), 1.74-1.81 (4H, m, CH), 1.64-1.66 (1H, m, CH), 1.38-1.42 (2H, m, CH), 1.23-1.28 (3H, m, CH). LCMS [ES<sup>+</sup>]: *m/z* 367 [M+H]<sup>+</sup>.

**N-(6-Phenyl-[1,2,4]triazolo[1,5-a]pyridinyl)cyclohexanecarboxamide (22).** Prepared according to general procedure B from [1,2,4]triazolo[1,5-a]pyridin-2-amine on a 0.12 mmol scale to afford the product as a colourless solid (20 mg, 54 %). <sup>1</sup>H NMR (500 MHz, DMSO) 10.73 (1H, s, NH), 9.22 (1H, bs, ArH), 8.00 (1H, dd, ArH, *J* = 9.2 and 1.8 Hz), 7.81 (2H, dd, ArH, *J* = 8.5 and 1.3 Hz), 7.76 (1H, dd, ArH, *J* = 9.3 and 0.6 Hz), 7.53 (2H, t, ArH, *J* = 7.4 Hz), 7.44 (1H, t, ArH, *J* = 7.4 Hz), 2.51-2.53 (1H, m, cyclohexyl-H), 1.83 (2H, bd, cyclohexyl-H, *J* = 12.7 Hz), 1.77 (2H, bd, cyclohexyl-H, *J* = 12.7 Hz), 1.66 (1H, bd, *J* = 11.6 Hz), 1.42 (2H, dq, cyclohexyl-H, *J* = 12.4 and 2.7 Hz), 1.19-1.32 (3H, m, Cyclohexyl-H). LCMS [ES<sup>+</sup>]: *m/z* 321 [M+H]<sup>+</sup>.

**N-(6-(4-Hydroxyphenyl)-[1,2,4]triazolo[1,5-a]pyridinyl)cyclohexanecarboxamide (23).** Prepared according to general procedure A on 0.62 mmol scale to afford the product as a colourless solid (63 mg, 30 %). <sup>1</sup>H NMR (500 MHz, DMSO): 10.69 (1H, s, NH), 9.73 (1H, s, OH), 9.07 (1H, bs, ArH), 7.91 (1H, dd, ArH, *J* = 9.3 and 1.8 Hz), 7.70 (1H, bd, ArH, *J* = 9.3 Hz), 7.62 (2H, dd, ArH, *J* = 6.6 and 2.0 Hz), 6.89 (2H, dd, ArH, *J* = 6.6 and 2.0 Hz), 2.51-2.53 (1H, m, cyclohexyl-H), 1.83 (2H, bd, Cyclohexyl-H, *J* = 12.9 Hz), 1.76 (2H, bd, cyclohexyl-H, *J* = 12.5 Hz), 1.66 (1H, bd, cyclohexyl-H, *J* = 11.2 Hz), 1.41 (2H, bq, Cyclohexyl-H, *J* = 12.1 Hz), 1.17-1.32 (3H, m, Cyclohexyl-H). LCMS [ES<sup>+</sup>]: *m/z* 337 [M+H]<sup>+</sup>.

**N-(6-(3-Methoxyphenyl)-[1,2,4]triazolo[1,5-a]pyridinyl)cyclohexanecarboxamide (24).** Prepared according to general procedure A on a 0.44 mmol scale to afford the product as a colourless solid (84 mg, 52 %). <sup>1</sup>H NMR (500 MHz, DMSO): 10.73 (1H, s, NH), 9.26 (1H, bs, 2-H), 8.01 (1H, dd, ArH, *J* = 9.1, 1.8 Hz), 7.75 (1H, bd, ArH, *J* = 9.3 Hz), 7.44 (1H, t, ArH, *J* = 5.3 Hz), 7.37-7.38 (2H, m, ArH), 3.87 (3H, s, OCH<sub>3</sub>), 7.00 (1H, dt, ArH, *J* = 7.2 and 1.6 Hz), 2.51-2.53 (1H, m, cyclohexyl-H), 1.83 (2H, bd, cyclohexyl-H, *J* = 13.0 Hz), 1.77 (2H, bd, cyclohexyl-H, *J* = 12.8 Hz), 1.66 (1H, bd, *J* = 11.6 Hz), 1.42 (2H, bq, cyclohexyl-H, *J* = 12.0 Hz), 1.16-1.32 (3H, m, cyclohexyl-H). LCMS [ES<sup>+</sup>]: *m/z* 351 [M+H]<sup>+</sup>.

**N-(6-(3-Chlorophenyl) [1,2,4]triazolo[1,5a]pyridinyl)cyclohexanecarboxamide (26).** Prepared according to general procedure A on a 0.15 mmol scale. Purification by column chromatography eluting with ether afforded the product as a colourless solid (21 mg, 38 %). <sup>1</sup>H NMR (500 MHz, CDCl<sub>3</sub>): 8.74 (1H, s, ArH), 8.16 (1H, bs, NH), 7.72 (1H, dd, ArH, *J* = 9.1 and 1.8 Hz), 7.64 (1H, d, ArH, *J* = 9.1 Hz), 7.54 (1H, s, ArH), 7.40-7.44 (2H, m, ArH), 2.01 (2H, d, cyclohexyl-H, *J* = 11.4 Hz), 1.85 (2H, dt, cyclohexyl-H, *J* = 9.9 and 3.0 Hz), 1.71 (1H, d, cyclohexyl-H, *J* = 10.5 Hz), 1.26-1.39 (4H, m, cyclohexyl-H), 0.88-0.77 (2H, m, cyclohexyl-H). LCMS [ES<sup>+</sup>]: *m/z* 245 [M+H]<sup>+</sup> *T<sub>R</sub>* = 2.9 min.

**N-(6-(1-Naphthyl) [1,2,4]triazolo[1,5a]pyridinyl)cyclohexanecarboxamide (27).** Prepared according to general procedure A on a 0.15 mmol scale. Purification by column chromatography eluting with ether afforded the product as a colourless solid (30 mg, 53 %). <sup>1</sup>H NMR (500 MHz, CDCl<sub>3</sub>): 8.81 (1H, s, ArH), 8.19 (1H, bs, NH), 7.95 (1H, s, ArH), 7.91 (1H, d, ArH, *J* = 8.6 Hz), 7.81-7.86 (3H, m, ArH), 7.63 (1H, d, ArH, *J* = 7.9 Hz), 7.60

(1H, dd, ArH,  $J = 7.3$  and  $1.9$  Hz), 7.60 (1H, dd, ArH,  $J = 7.3$  and  $1.9$  Hz), 7.45-7.51 (2H, m, ArH), 1.96 (2H, bd, cyclohex-H,  $J = 13.0$  Hz), 1.78 (2H, dt, cyclohex-H,  $J = 13.0$  and  $3.3$  Hz), 1.64 (1H, m, cyclohex-H,  $J = 10.6$  Hz), 1.52-1.58 (1H, m, cyclohex-H), 1.18-1.34 (5H, m, cyclohex-H). LCMS [ES<sup>+</sup>]:  $m/z$  371 [M+H]<sup>+</sup>  $T_R = 3.8$  min.

**N-(6-(4-Indole) [1,2,4]triazolo[1,5a]pyridinyl)cyclohexanecarboxamide (28).** Prepared according to general procedure A on a 0.46 mmol scale. Purification by column chromatography eluting with ether afforded the product as a colourless solid (66 mg, 33 %). <sup>1</sup>H NMR (500 MHz, DMSO  $\delta$ ): 10.74 (1H, s, NH), 11.42 (1H, s, NH), 9.02 (1H, s, ArH), 7.92 (1H, dd, ArH,  $J = 9.1$  and  $1.7$  Hz), 7.80 (1H, d, ArH,  $J = 9.1$  Hz), 7.51-7.50 (2H, m, ArH), 7.27-7.26 (2H, m, ArH), 6.62 (1H, s, ArH), 2.53-2.51 (1H, m, CH), 1.85 (2H, d, CH,  $J = 12.5$  Hz), 1.78 (2H, d, CH,  $J = 12.6$  Hz), 1.68 (1H, d, CH,  $J = 12.0$  Hz), 1.47-1.41 (2H, m, CH), 1.34-1.21 (3H, m, CH). LCMS [ES<sup>+</sup>]:  $m/z$  360 [M+H]<sup>+</sup>  $T_R = 3.3$ -3.5 min.

**N-(6-(4-N-Methylindole) [1,2,4]triazolo[1,5a]pyridinyl)cyclohexanecarboxamide (29).** Prepared according to general procedure A on a 0.46 mmol scale. Purification by column chromatography eluting with ether afforded the product as a colourless solid (73 mg, 35 %). <sup>1</sup>H NMR (500 MHz, DMSO  $\delta$ ): 10.72 (1H, s, NH), 9.00 (1H, s, ArH), 7.95 (1H, dd, ArH,  $J = 9.1$  and  $1.7$  Hz), 7.79 (1H, d, ArH,  $J = 9.1$  Hz), 7.54 (1H, d, ArH,  $J = 8.0$  Hz), 7.48 (1H, d, ArH,  $J = 3.1$  Hz), 7.31 (1H, dd, ArH,  $J = 7.9$  and  $7.4$  Hz), 7.25 (1H, d, ArH,  $J = 6.7$  Hz), 6.59 (1H, d, ArH,  $J = 3.1$  Hz), 3.87 (3H, s, CH<sub>3</sub>), 2.53-2.51 (1H, m, CH), 1.84-1.82 (2H, m, CH), 1.77-1.75 (2H, m, CH), 1.67-1.65 (1H, m, CH), 1.45-1.38 (2H, m, CH), 1.31-1.11 (3H, m, CH). LCMS [ES<sup>+</sup>]:  $m/z$  374 [M+H]<sup>+</sup>  $T_R = 3.5$ -3.7 min.

**N-(7-(3-Morpholinophenyl) [1,2,4]triazolo[1,5a]pyridinyl)cyclohexanecarboxamide (30).** Prepared according to general procedure A on a 0.46 mmol scale. Purification by column chromatography eluting with ether afforded the product as a colourless solid (68 mg, 36 %). <sup>1</sup>H NMR (500 MHz, DMSO  $\delta$ ): 10.70 (1H, s, NH), 9.23 (1H, s, ArH), 7.99 (1H, d, ArH,  $J = 8.7$  Hz), 7.72 (1H, d, ArH,  $J = 8.5$  Hz), 7.37-7.32 (2H, m, ArH), 7.21 (1H, d, ArH,  $J = 6.4$  Hz), 7.00 (1H, d, ArH,  $J = 7.7$  Hz), 3.77 (4H, s, 2 x CH<sub>2</sub>), 3.23 (4H, s, 2 x CH<sub>2</sub>), 1.83-1.75 (4H, m, CH), 1.66-1.64 (1H, m, CH), 1.45-1.38 (2H, m, CH), 1.28-1.18 (3H, m, CH). LCMS [ES<sup>+</sup>]:  $m/z$  406 [M+H]<sup>+</sup>  $T_R = 3.4$ -3.6 min.

**N-(7-(2,6-Dimethylphenyl) [1,2,4]triazolo[1,5a]pyridinyl)cyclohexanecarboxamide (31).** Prepared according to general procedure A on a 0.46 mmol scale. Purification by column chromatography eluting with ether afforded the product as a colourless solid (23 mg, 43 %). <sup>1</sup>H NMR (500 MHz, CDCl<sub>3</sub>): 8.57 (1H, bs, NH), 8.39 (1H, s, ArH), 7.65 (1H, d, ArH,  $J = 9.0$  Hz), 7.34 (1H, dd, ArH,  $J = 9.0$  and  $1.6$  Hz), 7.25 (1H, d, ArH,  $J = 7.6$  Hz), 7.16 (1H, d, ArH,  $J = 7.6$  Hz), 2.07 (6H, s, 2 x CH<sub>3</sub>), 2.01 (2H, d, cyclohexyl-H,  $J = 13.0$  Hz), 1.83-1.86 (2H, m, cyclohexyl-H), 1.69-1.71 (1H, m, cyclohexyl-H), 1.56-1.61 (2H, m, cyclohexyl-H), 1.25-1.35 (4H, m, cyclohexyl-H). LCMS [ES<sup>+</sup>]:  $m/z$  349 [M+H]<sup>+</sup>  $T_R = 3.7$  min.

**N-(7-(2,5-Dimethylphenyl) [1,2,4]triazolo[1,5a]pyridinyl)cyclohexanecarboxamide (32).** Prepared according to general procedure A on a 0.46 mmol scale. Purification by column chromatography eluting with ether afforded the product as a colourless solid (55 mg, 34 %). <sup>1</sup>H NMR (500 MHz, DMSO  $\delta$ ): 10.70 (1H, s, NH), 8.86 (1H, s, ArH), 7.72 (1H, d, ArH,  $J = 9.0$  Hz), 7.64 (1H, dd, ArH,  $J = 9.0$  and  $1.7$  Hz), 7.25 (1H, d, ArH,  $J = 8.4$  Hz), 7.17-7.18 (2H, m, ArH), 2.53-2.51 (1H, m, CH), 2.34 (3H, s, CH<sub>3</sub>), 2.25 (3H, s, CH<sub>3</sub>), 1.83 (2H, d, CH,  $J = 13.0$  Hz), 1.77 (2H, d, CH,  $J = 12.0$  Hz), 1.66 (1H, d, CH,  $J = 11.5$  Hz), 1.45-1.38 (2H, m, CH), 1.32-1.19 (3H, m, CH). LCMS [ES<sup>+</sup>]:  $m/z$  349 [M+H]<sup>+</sup>  $T_R = 4.6$ -4.7 min.

**N-(6-(4-Methoxy-3-methylphenyl)**

**[1,2,4]triazolo[1,5a]pyridinyl)cyclohexanecarboxamide (34).** Prepared according to general procedure A on a 0.46 mmol scale. Purification by column chromatography eluting with ether afforded the product as a colourless solid (67 mg, 33 %). <sup>1</sup>H NMR (500 MHz, DMSO  $\delta$ ): 10.69 (1H, s, NH), 9.12 (1H, s, ArH), 7.96 (1H, dd, ArH,  $J = 9.2$  and  $1.8$  Hz), 7.72 (1H, d, ArH,  $J = 9.2$  Hz), 7.63-7.61 (2H, m, ArH), 7.07 (1H, d, ArH,  $J = 8.7$  Hz), 3.85 (3H, s, OCH<sub>3</sub>), 2.53-2.51 (1H, m, CH), 2.25 (3H, s, CH<sub>3</sub>), 1.84-1.81 (2H, m, CH), 1.75-1.78 (2H, m, CH), 1.68-1.65 (1H, m, CH), 1.42-1.41 (2H, m, CH), 1.29-1.22 (3H, m, CH). LCMS [ES<sup>+</sup>]:  $m/z$  365 [M+H]<sup>+</sup>  $T_R = 3.6$ - $3.8$  min.

**6-m-Tolyl-[1,2,4]triazolo[1,5-a]pyridine-3-amine (35).** Prepared according to general procedure A on a 2.95 mmol scale. Purification by column chromatography eluting with ether afforded the product as a cream solid (660 mg, 100 %). <sup>1</sup>H NMR (500 MHz, CDCl<sub>3</sub>): 8.48 (1H, d, ArH,  $J = 0.7$  Hz), 8.10 (1H, d, ArH,  $J = 9.2$  Hz), 7.80 (1H, dt, ArH,  $J = 9.2$  and  $1.7$  Hz), 7.40 (1H, t, ArH,  $J = 7.6$  Hz), 7.32-7.35 (2H, m, ArH), 7.25-7.28 (1H, m, ArH), 5.62 (2H, bs, NH<sub>2</sub>), 2.44 (3H, s, CH<sub>3</sub>). LCMS [ES<sup>+</sup>]:  $m/z$  225 [M+H]<sup>+</sup>  $T_R = 3.0$  min.

**N-(Cyclohexylmethyl)-6-m-tolyl-[1,2,4]triazolo[1,5-a]pyridine-2-amine (36).** 27 (50 mg, 0.22 mmol), NaCNBH<sub>3</sub> (1M soln in THF, 0.33 mmol) and cyclohexanecarbaldehyde (37 mg, 0.33 mmol) were heated in a microwave reactor for 10 min at 180 °C, the reaction quenched with H<sub>2</sub>O, the THF removed in-vacuo and the residue portioned between EtOAc and H<sub>2</sub>O. The organic layer was dried over MgSO<sub>4</sub>, filtered and the solvent removed *in-vacuo*. Purification with column chromatography eluting with ether afforded the desired product as a colourless oil (27 mg, 36 %). <sup>1</sup>H NMR (500 MHz, CDCl<sub>3</sub>): 8.54 (1H, dd, ArH,  $J = 1.8$  and  $0.7$  Hz), 7.63 (1H, dd, ArH,  $J = 9.1$  and  $1.9$  Hz), 7.44 (1H, dd, ArH,  $J = 9.1$  and  $0.7$  Hz), 7.37-7.40 (3H, m, ArH), 7.23 (1H, d, ArH,  $J = 6.8$  Hz), 4.56 (1H, t, CH,  $J = 6.2$  Hz), 3.30 (2H, t, CH<sub>2</sub>,  $J = 6.5$  Hz), 2.45 (3H, s, CH<sub>3</sub>), 1.85-1.87 (2H, m, cyclohexyl-H), 1.73-1.78 (2H, m, cyclohexyl-H), 1.64-1.72 (2H, m, cyclohexyl-H), 1.16-1.19 (2H, m, cyclohexyl-H), 1.00-1.08 (2H, m, cyclohexyl-H). LCMS [ES<sup>+</sup>]:  $m/z$  321 [M+H]<sup>+</sup>  $T_R = 3.9$  min.

**N-(6-m-Tolyl-[1,2,4]triazolo[1,5-a]pyridinyl)acetamide (37).** Prepared according to general procedure B on a 0.45 mmol scale. Purification by column chromatography eluting with ether afforded the product as a white solid (40 mg, 33 %). <sup>1</sup>H NMR (500 MHz, DMSO): 10.83 (1H, s, NH), 9.21 (1H, s, ArH), 7.99 (1H, dd, ArH,  $J = 9.2$  and  $1.8$  Hz), 7.75 (1H, d, ArH,  $J = 9.1$  Hz), 7.64 (1H, s, ArH), 7.63-7.56 (1H, m, ArH), 7.41-7.38 (1H, m, ArH), 7.24 (1H, d, ArH,  $J = 7.4$  Hz), 2.40 (3H, s, CH<sub>3</sub>), 2.16 (3H, s, CH<sub>3</sub>). LCMS [ES<sup>+</sup>]:  $m/z$  267 [M+H]<sup>+</sup>  $T_R = 2.9$ - $3.2$  min.

**N-(6-m-Tolyl-[1,2,4]triazolo[1,5-a]pyridinyl)tetrahydrofuran-2-carboxamide (38).** Prepared according to general procedure B on a 0.45 mmol scale. Purification by column chromatography eluting with ether afforded the product as a clear oil (20 mg, 13 %). <sup>1</sup>H NMR (500 MHz, DMSO): 10.51 (1H, s, NH), 9.22 (1H, s, ArH), 8.01 (1H, dd, ArH,  $J = 9.2$  and  $1.8$  Hz), 7.78 (1H, dd, ArH,  $J = 9.2$  and  $0.7$  Hz), 7.64 (1H, s, ArH), 7.60 (1H, d, ArH,  $J = 8.1$  Hz), 7.40 (1H, t, ArH,  $J = 7.6$  Hz), 7.25 (1H, d, ArH,  $J = 7.5$  Hz), 4.52 (1H, s, CH), 4.02-3.98 (1H, m, CH), 3.85-3.81 (1H, m, CH), 2.40 (3H, s, CH<sub>3</sub>), 2.27-2.20 (1H, m, CH), 2.01-1.84 (3H, m, 3 x CH). LCMS [ES<sup>+</sup>]:  $m/z$  323 [M+H]<sup>+</sup>  $T_R = 4.9$ - $5.1$  min.

**N-(6-m-Tolyl-[1,2,4]triazolo[1,5-a]pyridinyl)tetrahydro-2H-pyran-4-carboxamide (39).** Prepared according to general procedure B on a 0.45 mmol scale. Purification by column chromatography eluting with ether afforded the product as a white solid (91 mg, 60 %). <sup>1</sup>H NMR (500 MHz, DMSO): 10.99 (1H, s, NH), 9.18 (1H, s, ArH), 7.99 (1H, dd, ArH,  $J = 9.2$  and  $1.8$  Hz), 7.75 (1H, d, ArH,  $J = 8.7$  Hz), 7.63 (1H, s, ArH), 7.59 (1H, d, ArH,  $J = 8.3$  Hz),

7.40 (1H, t, ArH,  $J = 7.6$  Hz), 7.25 (1H, d, ArH,  $J = 7.5$  Hz), 3.09-3.07 (1H, m, CH), 2.92-2.89 (1H, m, CH), 2.77-2.73 (1H, m, CH), 2.65-2.64 (1H, m, CH), 2.62-2.52 (1H, m, CH), 2.40 (3H, s, CH<sub>3</sub>), 1.92 (1H, m, NH), 1.67-1.59 (2H, m, CH), 1.47-1.45 (1H, m, CH), 1.24 (1H, s, CH). LCMS [ES<sup>+</sup>]:  $m/z$  337 [M+H]<sup>+</sup>  $T_R = 3.1$ -3.4 min.

**N-(6-m-Tolyl-[1,2,4]triazolo[1,5-a]pyridinyl)piperidine-3-carboxamide (40).** Prepared according to general procedure B on a 0.44 mmol scale. Purification by column chromatography eluting with ether afforded the t-BOC protected product as a cream solid (18 mg, 10 %). Deprotection with TFA:DCM (0.5:1 mL) afforded the desired product (4 mg, 28 %). <sup>1</sup>H NMR (500 MHz, DMSO): 10.99 (1H, bs, NH), 9.18 (1H, s, ArH), 7.99 (1H, dd, ArH,  $J = 9.2$  and 1.8 Hz), 7.75 (1H, d, ArH,  $J = 8.7$  Hz), 7.63 (1H, s, ArH), 7.59 (1H, d, ArH,  $J = 8.7$  Hz), 7.40 (1H, t, ArH,  $J = 7.6$  Hz), 7.25 (1H, d, ArH,  $J = 7.6$  Hz), 3.09-3.07 (1H, m, CH), 2.92-2.89 (1H, m, CH), 2.77-2.73 (1H, m, CH), 2.62-2.52 (1H, m, CH), 1.93-1.91 (1H, m, CH), 1.67-1.59 (2H, m, CH), 1.44 (1H, m, CH), 1.24 (1H, bs, CH). LCMS [ES<sup>+</sup>]:  $m/z$  336 [M+H]<sup>+</sup>  $T_R = 3.2$ -3.4 min.

**N-(6-m-Tolyl-[1,2,4]triazolo[1,5-a]pyridinyl)benzamide (41).** Prepared according to general procedure A on a 0.15 mmol scale. Purification by column chromatography eluting with ether afforded the product as a colourless solid (25 mg, 51 %). <sup>1</sup>H NMR (500 MHz, CDCl<sub>3</sub>): 9.39 (1H, s, NH), 8.81 (1H, s, ArH), 8.03 (3H, d, ArH,  $J = 7.4$  Hz), 7.77 (1H, dd, ArH,  $J = 9.2$  and 1.8 Hz), 7.61 (1H, t, ArH,  $J = 7.4$  Hz), 7.53 (2H, t, ArH,  $J = 7.4$  Hz), 7.48 (1H, d, ArH,  $J = 9.2$  Hz), 7.37-7.42 (2H, m, ArH), 2.52 (3H, s, CH<sub>3</sub>). LCMS [ES<sup>+</sup>]:  $m/z$  329 [M+H]<sup>+</sup>  $T_R = 4.5$ -4.6 min.

**N-(6-m-Tolyl-[1,2,4]triazolo[1,5-a]pyridinyl)cyclobutanecarboxamide (42).** Prepared according to general procedure A on a 0.15 mmol scale from 27, purification by column chromatography eluting with ether afforded the product as a colourless solid (20 mg, 44 %). <sup>1</sup>H NMR (500 MHz, CDCl<sub>3</sub>): 8.75 (1H, bs, NH), 8.11 (1H, bs, ArH), 7.76 (1H, dd, ArH,  $J = 9.2$  and 1.8 Hz), 7.63 (1H, d, ArH,  $J = 9.2$  Hz), 7.32-7.41 (1H, m, ArH), 7.22 (1H, d, ArH,  $J = 6.5$  Hz), 2.46 (3H, s, CH<sub>3</sub>), 2.05 (2H, m, cyclobutyl-H), 1.83 (2H, m, cyclobutyl-H), 1.30-1.45 (3H, m, cyclobutyl-H). LCMS [ES<sup>+</sup>]:  $m/z$  307 [M+H]<sup>+</sup>  $T_R = 3.6$  min.

**N-(6-m-Tolyl-[1,2,4]triazolo[1,5-a]pyridinyl)cyclopentanecarboxamide (43).** 3-Cyclopentanecarbonyl chloride (29  $\mu$ L, 0.22 mmol) was added to a stirred solution of 27 (50 mg, 0.22 mmol), pyridine (anhydrous, 0.4 mL) and DMAP (2 mg, 0.02 mmol) at 0 °C. The reaction mixture was stirred at rt for 16 h diluted with DCM and washed with 15 % NaOH solution (2 x 10 mL), dried over MgSO<sub>4</sub>, filtered and the solvent removed *in-vacuo*. Column chromatography eluting with ether afforded the desired product (14 mg, 20 %). <sup>1</sup>H NMR (500 MHz, CDCl<sub>3</sub>): 8.55 (1H, s, ArH), 8.15 (1H, bs, ArH), 7.76 (1H, dd, ArH,  $J = 9.2$  and 1.8 Hz), 7.62 (1H, d, ArH,  $J = 9.2$  Hz), 7.36-7.40 (3H, m, ArH), 7.23-7.25 (1H, m, ArH), 2.84 (1H, bs, CH), 2.44 (3H, s, CH<sub>3</sub>), 1.93-2.00 (4H, m, cyclopentyl-H), 1.77-1.85 (2H, m, cyclopentyl-H), 1.68-1.68 (2H, m, cyclopentyl-H). LCMS [ES<sup>+</sup>]:  $m/z$  321 [M+H]<sup>+</sup>  $T_R = 3.5$ -3.6 min.

**2-Cyclohexyl-N-(6-m-tolyl-[1,2,4]triazolo[1,5-a]pyridinyl)acetamide (45).** Prepared following general procedure B on a 0.44 mmol scale to afford the desired product (24 mg, 16 %). <sup>1</sup>H NMR (500 MHz, CDCl<sub>3</sub>): 10.76 (1H, bs, NH), 9.19 (1H, s, ArH), 7.98 (1H, d, ArH,  $J = 8.6$  Hz), 7.74 (1H, d, ArH,  $J = 9.7$  Hz), 7.63 (1H, s, ArH), 7.58 (1H, d, ArH,  $J = 8.2$  Hz), 7.40 (1H, t, ArH,  $J = 7.0$  Hz), 7.24 (1H, d, ArH,  $J = 8.2$  Hz), 2.40 (3H, s, CH<sub>3</sub>), 2.30 (1H, bs, CH), 1.63-1.72 (5H, cyclohexyl-H), 1.13-1.24 (4H, m, cyclohexyl), 0.94-0.99 (2H, m, cyclohexyl-H). LCMS [ES<sup>+</sup>]:  $m/z$  349 [M+H]<sup>+</sup>  $T_R = 3.7$ -3.8 min.

**3-Cyclopentyl-N-(6-m-tolyl-[1,2,4]triazolo[1,5-a]pyridinyl)propanamide (46).** Prepared following general procedure B on a 0.44 mmol scale to afford the desired product (92 mg, 59 %). <sup>1</sup>H NMR (500 MHz, CDCl<sub>3</sub>): 10.54 (1H, bs, NH), 8.95 (1H, s, ArH), 7.74 (1H, d, ArH, *J* = 9.0 Hz), 7.51 (1H, d, ArH, *J* = 9.0 Hz), 7.40 (1H, s, ArH), 7.35 (1H, d, ArH, *J* = 7.3 Hz), 7.16 (1H, t, ArH, *J* = 7.3 Hz), 7.00 (1H, d, ArH, *J* = 7.3 Hz), 2.16 (3H, s, CH<sub>3</sub>), 1.52 (3H, bs, cyclohexyl-H), 1.37 (4H, bs, cyclohexyl-H), 1.25 (2H, bs, cyclohexyl-H), 0.87 (2H, bs, cyclohexyl-H). LCMS [ES<sup>+</sup>]: *m/z* 349 [M+H]<sup>+</sup> *T<sub>R</sub>* = 3.5 min.

**6-(3,5-Dimethylphenyl)-[1,2,4]triazolo[1,5-a]pyridin-3-amine (20b).** 6-Bromo-[1,2,4]triazolo[1,5-a]pyridine-2-amine (0.63 g, 2.96 mmol) was suspended in DMF (5 mL) and K<sub>2</sub>CO<sub>3</sub> (2M, 5 mL), Pd(PPh<sub>3</sub>)<sub>4</sub> (0.1 g 0.09 mmol) and 3,5-dimethylboronic acid (0.75 g, 0.5 mmol) were heated at 160 °C for 5 min in  $\mu$ W reactor. The reaction was diluted with EtOAc washed with LiCl (5 % aq., 20 mL), NaOH (15 %, 20 mL) and H<sub>2</sub>O (3 x 30 mL), dried over MgSO<sub>4</sub>, filtered and the solvent removed *in-vacuo*. Column chromatography eluting with EtOAc afforded the desired product (136 mg, 24 %). <sup>1</sup>H NMR (500 MHz, CDCl<sub>3</sub>): 8.48 (1H, dd, ArH, *J* = 1.8 and 0.8 Hz), 7.64 (1H, dd, ArH, *J* = 9.1 and 1.8 Hz), 7.46 (1H, dd, ArH, *J* = 9.1 and 0.8 Hz), 7.16 (2H, s, ArH), 7.05 (1H, s, ArH), 4.47 (2H, bs, NH<sub>2</sub>), 2.40 (6H, s, 2 x CH<sub>3</sub>). LCMS [ES<sup>+</sup>]: *m/z* 239 [M+H]<sup>+</sup> *T<sub>R</sub>* = 3.1-3.3 min.

**N-(6-(3,5-Dimethylphenyl)-[1,2,4]triazolo[1,5-a]pyridinyl)-3-phenylpropanamide (47).** Prepared following general procedure F on a 0.21 mmol scale. Column chromatography eluting with ether afforded the desired product (61 mg, 82 %). <sup>1</sup>H NMR (500 MHz, CDCl<sub>3</sub>): 8.72 (1H, bs, NH), 8.41 (1H, bs, ArH), 7.74 (1H, dd, ArH, *J* = 9.2 and 1.8 Hz), 7.61 (1H, d, ArH, *J* = 9.2 Hz), 7.27 – 7.30 (3H, m, ArH), 7.20-7.24 (2H, m, ArH), 7.18 (1H, s, ArH), 7.08 (1H, s, ArH), 3.12 (2H, t, CH<sub>2</sub>, *J* = 7.7 Hz), 2.41 (6H, s, 2 x CH<sub>3</sub>), 1.58 (2H, s, CH<sub>2</sub>). LCMS [ES<sup>+</sup>]: *m/z* 371 [M+H]<sup>+</sup> *T<sub>R</sub>* = 3.5-3.6 min.

**N-(6-(3,5-Dimethylphenyl)-[1,2,4]triazolo[1,5-a]pyridinyl)cycloheptanecarboxamide (48).** Prepared following general procedure F on a 0.21 mmol scale. Column chromatography eluting with ether afforded the desired product (36 mg, 50 %). <sup>1</sup>H NMR (500 MHz, CDCl<sub>3</sub>): 9.16 (1H, bs, NH<sub>2</sub>), 8.75 (1H, s, ArH), 7.77 (1H, dd, ArH, *J* = 9.1 and 1.8 Hz), 7.61 (1H, d, ArH, *J* = 9.1 Hz), 7.16 (2H, s, ArH), 7.07 (1H, s, ArH), 2.40 (6H, s, 2 x CH<sub>3</sub>), 2.00-2.07 (2H, m, cycloheptyl-H), 1.84-1.97 (5H, m, cycloheptyl-H), 1.48-1.62 (7H, m, cycloheptyl-H). LCMS [ES<sup>+</sup>]: *m/z* 363 [M+H]<sup>+</sup> *T<sub>R</sub>* = 2.9 min.

#### General procedure for the preparation of ureas 50, 52-61

**1-(5,5-Dimethyl-3-oxocyclohex-1-en-1-yl)-3-phenylurea (50):** 3-Amino-5,5-dimethylcyclohexeneone (100 mg, 0.72 mmol) was dissolved in 1,4-dioxane (3 ml) then phenylisocyanate (0.93 ml, 0.86 mmol) was added in one portion at room temperature. The reaction mixture was heated to 90 °C with stirring for 16 h then cooled to room temperature. The resulting precipitate was collected, washed with 1,4-dioxane (5 ml) and diethyl ether (5 x 5 ml) and dried under vacuum to give **50** as a white solid (107 mg, 58 % yield). <sup>1</sup>H NMR (DMSO, 500 MHz)  $\delta$ =8.91 (1H, s, NH), 8.66 (1H, s, NH), 7.44-7.41 (2H, m, ArH), 7.32-7.29 (2H, m, ArH), 7.04-7.01 (1H, m, ArH), 6.45 (1H, s, CH), 2.33 (2H, s, CH<sub>2</sub>), 2.11 (2H, s, CH<sub>2</sub>) and 1.02 (6H, s, Me). LCMS 97% (M+H, 259)

**1-(Cyclohexylmethyl)-3-(5,5-dimethyl-3-oxocyclohex-1-en-1-yl)urea (53):** Prepared following general procedure A to afford **53** as a white solid (61 mg, 31% yield). <sup>1</sup>H NMR (DMSO, 500 MHz)  $\delta$ = 8.40 (1H, s, NH), 6.48 (1H, t, *J*=5.8Hz, NH), 6.39 (1H, s, CH), 2.90 (2H, t, *J*=6.3Hz, CH), 2.24 (2H, s, CH<sub>2</sub>), 2.05 (2H, s, CH<sub>2</sub>), 1.70-1.66 (5H, m, CH), 1.38-1.34 (1H, m, CH), 1.23-1.08 (3H, m, CH), 0.99 (6H, s, Me), and 0.91-0.83 (2H, m, CH). LCMS 98% (M+H, 279).



**1-(5,5-Dimethyl-3-oxocyclohex-1-en-1-yl)-3-(2-methoxyphenyl)urea (55):** Prepared following general procedure A to afford **55** as a white solid (114 mg, 55% yield). <sup>1</sup>H NMR (DMSO, 500 MHz) δ=9.24 (1H, s, NH), 8.51 (1H, s, NH), 8.04 (1H, dd, J=1.5 and 8.0Hz, ArH), 7.05-6.98 (2H, m, ArH), 6.93-6.89 (1H, m, ArH), 6.50 (1H, s, CH), 3.87 (3H, s, Me), 2.32 (2H, s, CH<sub>2</sub>), 2.11 (2H, s, CH<sub>2</sub>) and 1.03 (6H, s, Me). LCMS 100% (M+H, 289).

**1-(5,5-Dimethyl-3-oxocyclohex-1-en-1-yl)-3-(4-methoxyphenyl)urea (57):** Prepared following general procedure A to afford **57** as a white solid (113 mg, 50% yield). <sup>1</sup>H NMR (DMSO, 500 MHz) δ=8.71 (1H, s, NH), 8.58 (1H, s, NH), 7.33 (2H, d, J=8.7Hz, ArH), 6.89 (2H, d, J=8.7Hz, ArH), 6.43 (1H, s, CH), 3.72 (3H, s, Me), 2.32 (2H, s, CH<sub>2</sub>), 2.10 (2H, s, CH<sub>2</sub>) and 1.02 (6H, s, Me). LCMS 100% (M+H, 289).

**1-(4-(Benzyloxy)phenyl)-3-(5,5-dimethyl-3-oxocyclohex-1-en-1-yl)urea (58):** Prepared following general procedure A to afford **58** as a white solid (166 mg, 60% yield). <sup>1</sup>H NMR (DMSO, 500 MHz) δ=8.73 (1H, s, NH), 8.60 (1H, s, NH), 7.46-7.38 (7H, m, ArH), 7.35-7.31 (2H, m, ArH), 6.43 (1H, s, CH), 5.07 (2H, s, CH<sub>2</sub>), 2.32 (2H, s, CH<sub>2</sub>), 2.10 (2H, s, CH<sub>2</sub>) and 1.02 (6H, s, Me). LCMS 96% (M+H, 365).

**Methyl 4-(3-(5,5-dimethyl-3-oxocyclohex-1-en-1-yl)ureido)benzoate (59):** Prepared following general procedure A to afford **59** as a white solid (101 mg, 44% yield). <sup>1</sup>H NMR (DMSO, 500 MHz) δ=9.31 (1H, s, NH), 8.77 (1H, s, NH), 7.91 (2H, d, J=8.8Hz, ArH), 7.57 (2H, d, J=8.8Hz, ArH), 6.45 (1H, s, CH), 3.82 (3H, s, Me), 2.35 (2H, s, CH<sub>2</sub>), 2.12 (2H, s, CH<sub>2</sub>) and 1.02 (6H, s, Me). LCMS 100% (M+H, 316).

**1-(5,5-Dimethyl-3-oxocyclohex-1-en-1-yl)-3-(4-hydroxyphenyl)urea (60):** Compound **12** (50 mg, 0.14 mmol) was dissolved in MeOH (8 ml) and water (2 ml) then Pd(OH)<sub>2</sub> (10 mg of 20% w/w on carbon) was added in one portion. The mixture was evacuated the back filled with Argon the process repeated then the flask evacuated and filled with hydrogen. The reaction was stirred vigorously for 20 hours then evacuated and back filled with nitrogen twice before opening the reaction to air. The reaction mixture was filtered through celite washing with MeOH (2 × 10 ml) then concentrated under vacuum. Triturating with hot Et<sub>2</sub>O gave **60** as a white solid (11 mg, 0.40 mmol, 29% yield). <sup>1</sup>H NMR (DMSO, 500 MHz) δ=9.19 (1H, s), 8.61 (1H, s), 8.57 (1H, s), 7.20 (2H, d, J=8.7Hz, ArH), 6.70 (2H, d, J=8.7Hz, ArH), 6.42 (1H, s, CH), 2.31 (2H, s, CH<sub>2</sub>), 2.09 (2H, s, CH<sub>2</sub>) and 1.02 (6H, s, Me). LCMS 100% (M+H, 275).

**1-(3-Oxocyclohex-1-en-1-yl)-3-phenylurea (61):** Prepared following general procedure A to afford **61** as a white solid (147 mg, 71% yield). <sup>1</sup>H NMR (DMSO, 500 MHz) δ=8.98 (1H, s, NH), 8.74 (1H, s, NH), 7.43-7.41 (2H, m, ArH), 7.32-7.29 (2H, m, ArH), 7.04-7.01 (1H, m, ArH), 6.46 (1H, s, CH), 2.44 (2H, t, J=6.0Hz, CH<sub>2</sub>), 2.23-2.20 (2H, m, CH<sub>2</sub>) and 1.93-1.88 (2H, m, CH<sub>2</sub>). LCMS 100% (M+H, 231).
